# Supplementary material
Source: PubMed Central journal article supplement (PMC6648750)
Supplement: ao9b00243_si_001.pdf [file ao9b00243_si_001.pdf]

## Supplementary Information

### Towards high power generating piezoelectric nanofibers: Influence of particle size and surface electrostatic interaction of Ce-Fe<sub>2</sub>O<sub>3</sub> and Ce-Co<sub>3</sub>O<sub>4</sub> on PVDF

Hemalatha Parangusan<sup>1</sup>, Deepalekshmi Ponnamma<sup>1\*</sup>, Mariam Al- Ali Al Maadeed<sup>2</sup>

<sup>1</sup>Center for Advanced Materials, Qatar University, P O Box 2713, Doha, Qatar.

<sup>2</sup>Materials Science & Technology Program (MATS), College of Arts & Sciences, Qatar University, Doha 2713, Qatar

#### Supporting Information-Figure S1

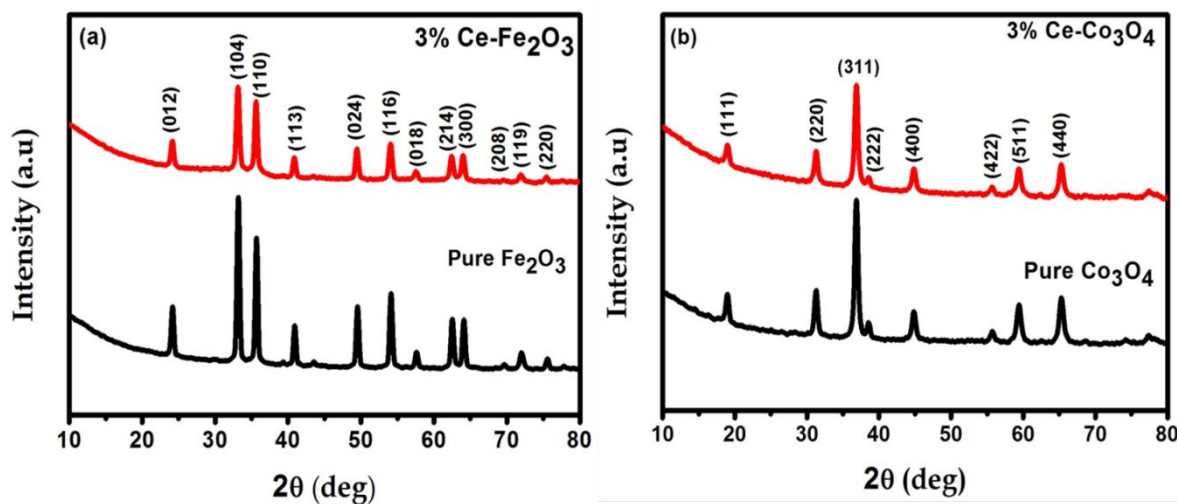

Figure S1: XRD pattern of (a) 3 wt.% Ce-doped Fe<sub>2</sub>O<sub>3</sub> and (b) 3 wt.% Ce-doped Co<sub>3</sub>O<sub>4</sub>.

#### Supporting Information-Figure S2

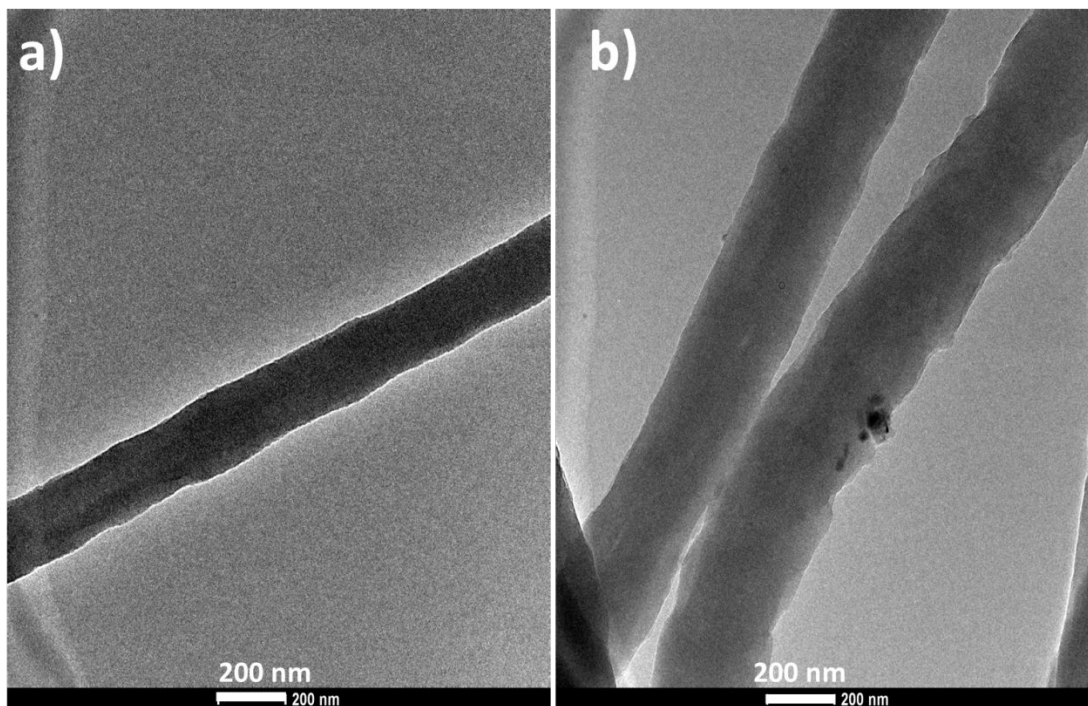

**Figure S2:** TEM images of (a) PVDF/2wt.% Ce-Fe<sub>2</sub>O<sub>3</sub> (b) PVDF/2wt.% Ce-Co<sub>3</sub>O<sub>4</sub> samples.

### Supporting Information-Figure S3

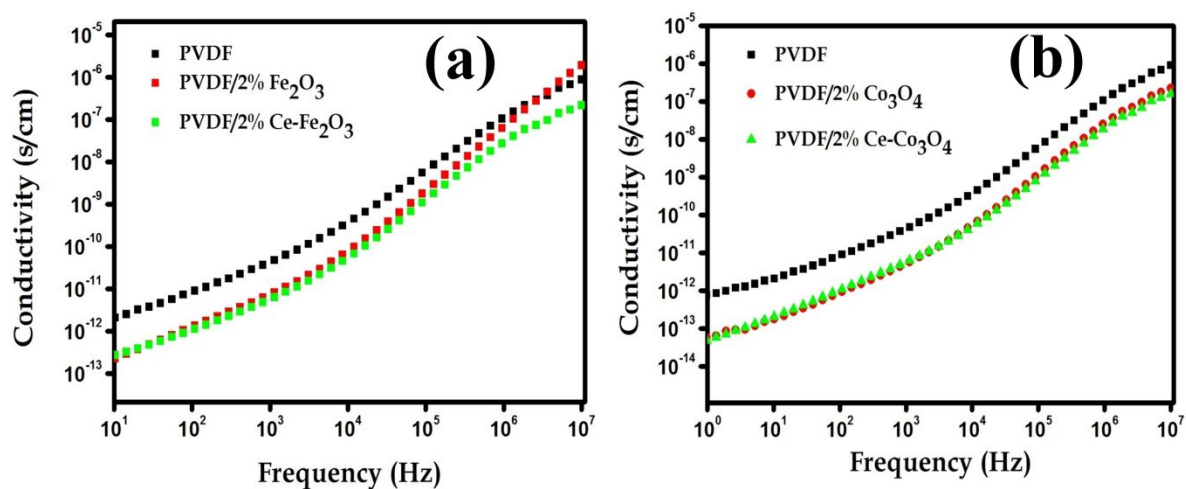

**Figure S3:** Conductivity spectra of neat PVDF, PVDF/2wt% Ce-Fe<sub>2</sub>O<sub>3</sub> (a) and PVDF/2wt% Ce-Co<sub>3</sub>O<sub>4</sub>(b) nanofibers.

### Supporting Information-Figure S4

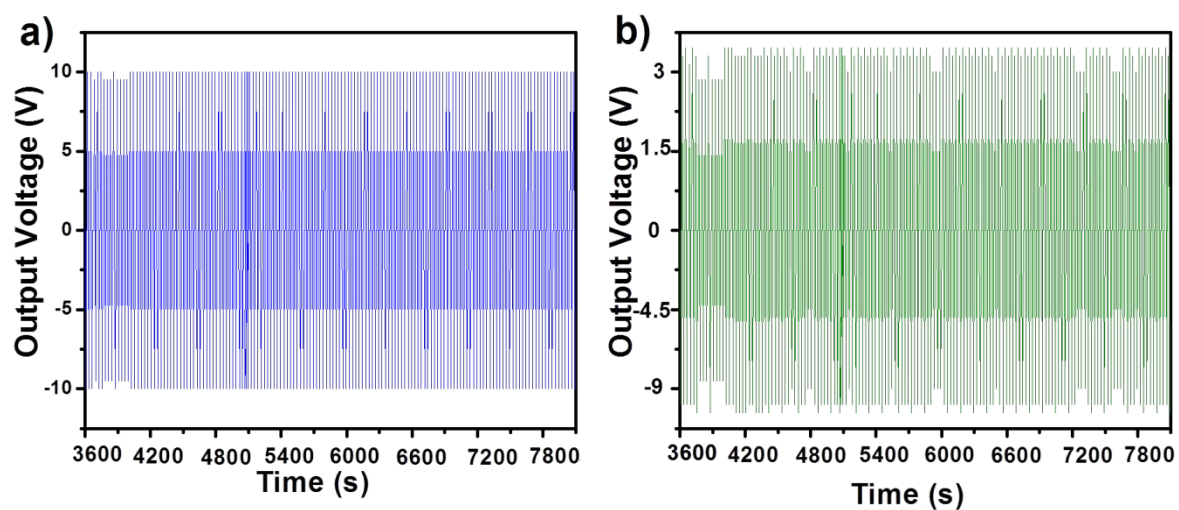

**Figure S4:** Stability of piezoelectric output voltage over the period of 2 h a) PVDF/2wt% Ce-Fe<sub>2</sub>O<sub>3</sub> and (b) PVDF/2wt% Ce-Co<sub>3</sub>O<sub>4</sub> nanofibers.

### Supporting Information-Table S1

**Table S1.**  $\gamma$ - Phase crystallinity and degree of crystallinity in the PVDF and its nanocomposites determined from the FTIR and DSC spectra.

| Samples                                   | $\gamma$ -Phase crystallinity by FTIR | Crystallinity Index by DSC |
|-------------------------------------------|---------------------------------------|----------------------------|
|                                           | spectra (%)                           | X <sub>c</sub> (%)         |
| Neat PVDF                                 | 45                                    | 41.2                       |
| PVDF/2% Fe <sub>2</sub> O <sub>3</sub>    | 68                                    | 43.60                      |
| PVDF/2% Ce-Fe <sub>2</sub> O <sub>3</sub> | 75                                    | 44.21                      |
| PVDF/ 2% Co <sub>3</sub> O <sub>4</sub>   | 65                                    | 42.19                      |
| PVDF/2% Ce-Co <sub>3</sub> O <sub>4</sub> | 70                                    | 43.20                      |
